# Supplementary material
Source: Springer Nature journal article supplement (https://www.springermedizin.de/resource/supplementary/12955_2013_1254_MOESM4_ESM.pdf/9559188)
Supplement: MOESM4 [file 9559188]

TCM ancient literature

294 items

218 items not referring to AD symptoms

76 items referring to AD symptoms

5 repeat items removed

Final total of 71 items

```
graph TD; A[TCM ancient literature] --> B[294 items]; B --> C[218 items not referring to AD symptoms]; B --> D[76 items referring to AD symptoms]; D --> E[5 repeat items removed]; D --> F[Final total of 71 items];
```
